# Supplementary material for: Negative Impact of Female Sex on Outcomes from Repetitive Mild Traumatic Brain Injury in hTau Mice Is Age Dependent: A Chronic Effects of Neurotrauma Consortium Study
Source: PubMed Central journal article supplement (PMC5744460; doi:10.3389/fnagi.2017.00416), 2017-12-22
Supplement: Image1.pdf [file Image1.pdf]

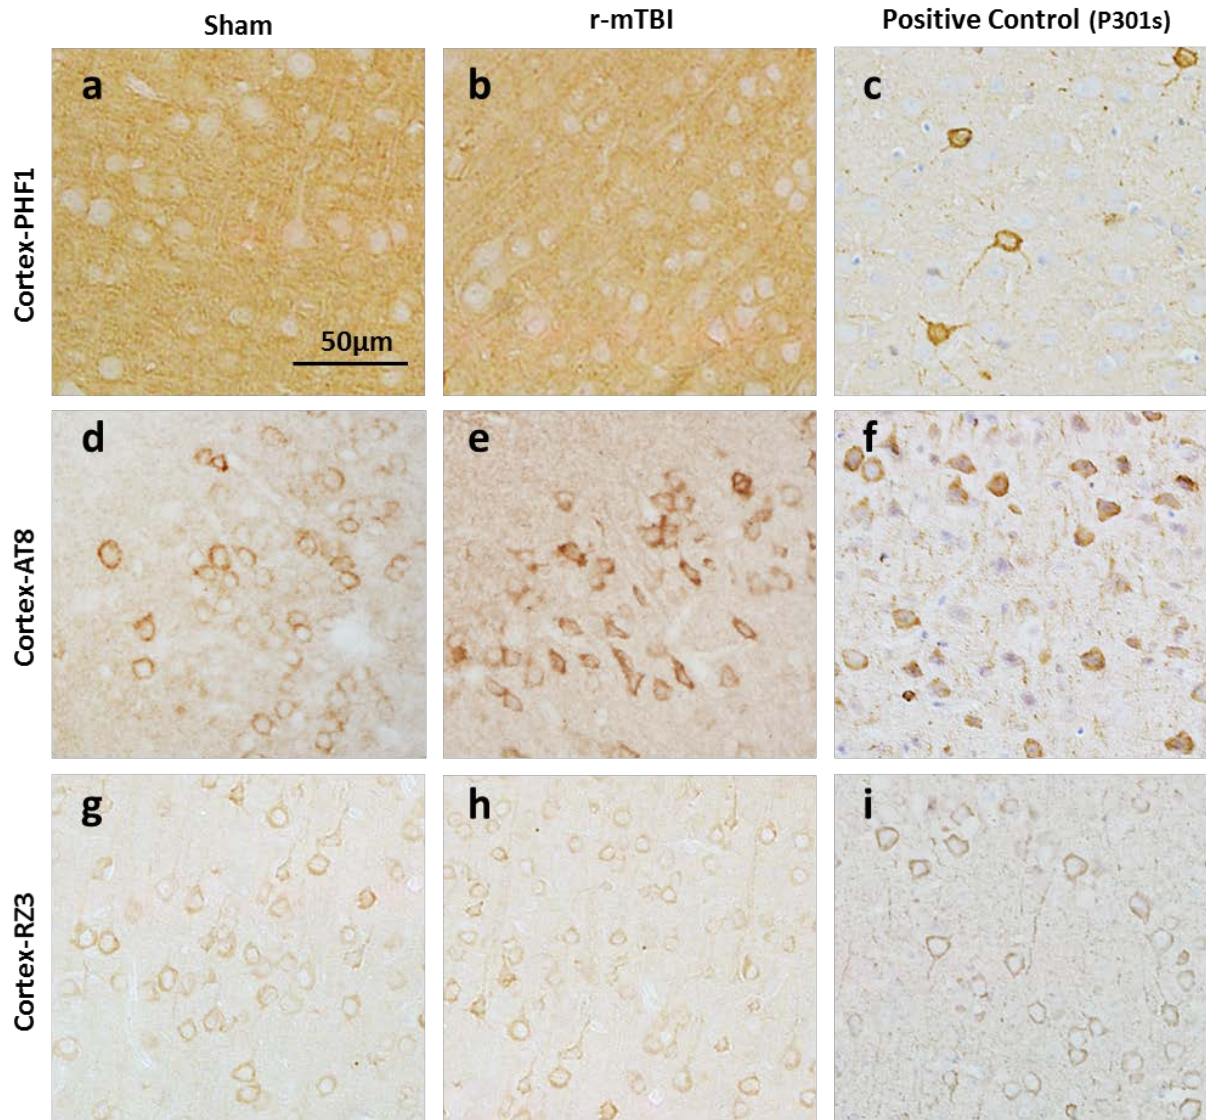

**Supplemental Figure 1.** Immunohistochemical assessment of phospho-tau antibodies and neurofibrillary tangles in aged hTau male animals at 15 days post injury. We observed no age or gender effect in pTau Ser 396/404 (PHF1) (a,b), pTau Ser 202, Thr205 (AT8) (d,e) or pTau pT231 (RZ3) (g,h) immunostaining in the cortex (and in the CA1 or CA3 sub-region of the hippocampus) of injured compared to sham animals. Immunostaining for PHF1, AT8 and RZ3 from a P301L mouse is shown in the right panels (c, f, i) for positive comparison.
